# Supplementary material for: Use of pragmatic randomized trials in multiple sclerosis: A systematic overview
Source: PubMed Central journal article supplement — Mult Scler. 2024 Jan 22;30(4-5):463–78. doi: 10.1177/13524585231221938 (PMC11010556; doi:10.1177/13524585231221938), 2024-01-22
Supplement: sj-pdf-1-msj-10.1177_13524585231221938.pdf [file sj-pdf-1-msj-10.1177_13524585231221938.pdf]

# Use of pragmatic randomized trials in Multiple Sclerosis: a systematic overview

## Appendix 1. Search strategy

Initial search strategy in MEDLINE/Ovid; last search: December 1, 2022; hits: 257.

Note: For the pragmatic component of the search strategy (#1-#11), we selected a sensitivity-maximizing search for pragmatic trials that was designed for Ovid MEDLINE<sup>16</sup>. For the Multiple Sclerosis component, we selected keywords and controlled vocabulary that was used by the Canadian Agency for Drugs and Technologies in Health (CADTH)<sup>17</sup>.

| Search | Query                                                                                                                                                                                                                                                                                                                                                                                                                                                                                                                                                                                           |
|--------|-------------------------------------------------------------------------------------------------------------------------------------------------------------------------------------------------------------------------------------------------------------------------------------------------------------------------------------------------------------------------------------------------------------------------------------------------------------------------------------------------------------------------------------------------------------------------------------------------|
| #1     | ((pragmatic\$ OR naturalistic OR real world OR real life OR unblinded OR unmasked OR cluster OR step\$ wedge\$ OR point of care OR factorial OR switchback OR switch back OR phase 4 OR phase IV) adj10 (study OR trial)) OR (practical trial OR effectiveness trial OR ((cluster\$ or communit\$) adj2 randomi\$)).tw.                                                                                                                                                                                                                                                                         |
| #2     | (general practice\$ OR primary care OR registry based OR health record\$ OR medical record\$ OR EHR OR EMR OR administrative data OR routinely collected data OR (communit\$ adj2 intervention\$) OR quality improvement OR implementation OR decision support OR health service\$ OR health system\$ OR comparative effectiveness OR CER OR usual care OR evidence based OR practice guideline\$ OR (guideline\$ adj1 recommend\$) OR knowledge translation OR health technology assessment OR HTA OR cost effectiveness OR process evaluation OR economic evaluation OR patient oriented).tw. |
| #3     | randomized controlled trial.pt. OR ((comparative effectiveness OR randomi?ed) adj10 (trial OR study)).ti.                                                                                                                                                                                                                                                                                                                                                                                                                                                                                       |
| #4     | (comment on OR phase 1 OR phase I OR phase 2 OR phase II OR non-randomi?ed OR quasi-randomi?ed OR pseudo-randomi?ed).ti. OR (clinical trial, phase I OR clinical trial, phase II OR systematic review OR meta-analysis OR review OR editorial).pt.                                                                                                                                                                                                                                                                                                                                              |
| #5     | pragmatic clinical trial.pt.                                                                                                                                                                                                                                                                                                                                                                                                                                                                                                                                                                    |
| #6     | 1 or 2                                                                                                                                                                                                                                                                                                                                                                                                                                                                                                                                                                                          |
| #7     | 3 not 4                                                                                                                                                                                                                                                                                                                                                                                                                                                                                                                                                                                         |
| #8     | 6 and 7                                                                                                                                                                                                                                                                                                                                                                                                                                                                                                                                                                                         |
| #9     | 5 or 8                                                                                                                                                                                                                                                                                                                                                                                                                                                                                                                                                                                          |
| #10    | exp Animals/ NOT Humans/                                                                                                                                                                                                                                                                                                                                                                                                                                                                                                                                                                        |
| #11    | 9 NOT 10                                                                                                                                                                                                                                                                                                                                                                                                                                                                                                                                                                                        |
| #12    | Multiple Sclerosis, Relapsing-Remitting/ or multiple sclerosis/                                                                                                                                                                                                                                                                                                                                                                                                                                                                                                                                 |
| #13    | (relapsing remitting adj2 multiple sclerosis).ti,ab,sh,hw,ot.                                                                                                                                                                                                                                                                                                                                                                                                                                                                                                                                   |
| #14    | (remitting relapsing adj2 multiple sclerosis).ti,ab,sh,hw,ot.                                                                                                                                                                                                                                                                                                                                                                                                                                                                                                                                   |
| #15    | ((relapsing remitting adj2 ms) or (remitting relapsing adj2 ms)).ti,ab,sh,hw,ot.                                                                                                                                                                                                                                                                                                                                                                                                                                                                                                                |
| #16    | ((exacerbate* or disseminated or insular or secondary progressive or primary progressive or progressive relapsing) adj2 (sclerosis or ms)).ti,ab,sh,hw,ot.                                                                                                                                                                                                                                                                                                                                                                                                                                      |
| #17    | (rrms or encephalomyelitis disseminat*).ti,ab,sh,hw,ot.                                                                                                                                                                                                                                                                                                                                                                                                                                                                                                                                         |
| #18    | 12 or 13 or 14 or 15 or 16 or 17                                                                                                                                                                                                                                                                                                                                                                                                                                                                                                                                                                |
| #19    | sclerosis.ab,ti.                                                                                                                                                                                                                                                                                                                                                                                                                                                                                                                                                                                |
| #20    | 18 or 19                                                                                                                                                                                                                                                                                                                                                                                                                                                                                                                                                                                        |
| #21    | 11 AND 20                                                                                                                                                                                                                                                                                                                                                                                                                                                                                                                                                                                       |

To quantify the sensitivity of the above search strategy for pragmatic trials, we selected a random sample of 100 articles identified in MEDLINE/Ovid (last search 19 December 2022; hits: 3249) with a randomized trials filter combined with the MS search strategy but without applying restrictions for pragmatic trials.

Note: For the trial component of the search strategy (#1-#11), we adapted the focused search strategy (Appendix 1) and selected the keywords and controlled vocabulary related to trials<sup>16</sup>. For the Multiple Sclerosis component, we selected keywords and controlled vocabulary that was used by the Canadian Agency for Drugs and Technologies in Health (CADTH)<sup>17</sup>.

| Search | Query                                                                                                                                                                                                                                              |
|--------|----------------------------------------------------------------------------------------------------------------------------------------------------------------------------------------------------------------------------------------------------|
| #1     | randomized controlled trial.pt. OR ((comparative effectiveness OR randomi?ed) adj10 (trial OR study)).ti.                                                                                                                                          |
| #2     | (comment on OR phase 1 OR phase I OR phase 2 OR phase II OR non-randomi?ed OR quasi-randomi?ed OR pseudo-randomi?ed).ti. OR (clinical trial, phase I OR clinical trial, phase II OR systematic review OR meta-analysis OR review OR editorial).pt. |
| #3     | 1 not 2                                                                                                                                                                                                                                            |
| #4     | pragmatic clinical trial.pt.                                                                                                                                                                                                                       |
| #5     | 3 or 4                                                                                                                                                                                                                                             |
| #6     | exp Animals/NOT Humans/                                                                                                                                                                                                                            |
| #7     | 5 not 6                                                                                                                                                                                                                                            |
| #8     | Multiple Sclerosis, Relapsing-Remitting/ or multiple sclerosis/                                                                                                                                                                                    |
| #9     | (relapsing remitting adj2 multiple sclerosis).ti,ab,sh,hw,ot.                                                                                                                                                                                      |
| #10    | (remitting relapsing adj2 multiple sclerosis).ti,ab,sh,hw,ot.                                                                                                                                                                                      |
| #11    | ((relapsing remitting adj2 ms) or (remitting relapsing adj2 ms)).ti,ab,sh,hw,ot.                                                                                                                                                                   |
| #12    | ((exacerbate* or disseminated or insular or secondary progressive or primary progressive or progressive relapsing) adj2 (sclerosis or ms)).ti,ab,sh,hw,ot.                                                                                         |
| #13    | (rrms or encephalomyelitis disseminat*).ti,ab,sh,hw,ot.                                                                                                                                                                                            |
| #14    | 8 or 9 or 10 or 11 or 12 or 13                                                                                                                                                                                                                     |
| #15    | sclerosis.ab,ti.                                                                                                                                                                                                                                   |
| #16    | 14 or 15                                                                                                                                                                                                                                           |
| #17    | 7 AND 16                                                                                                                                                                                                                                           |

## Appendix 2. Illustration of the literature search and study selection process

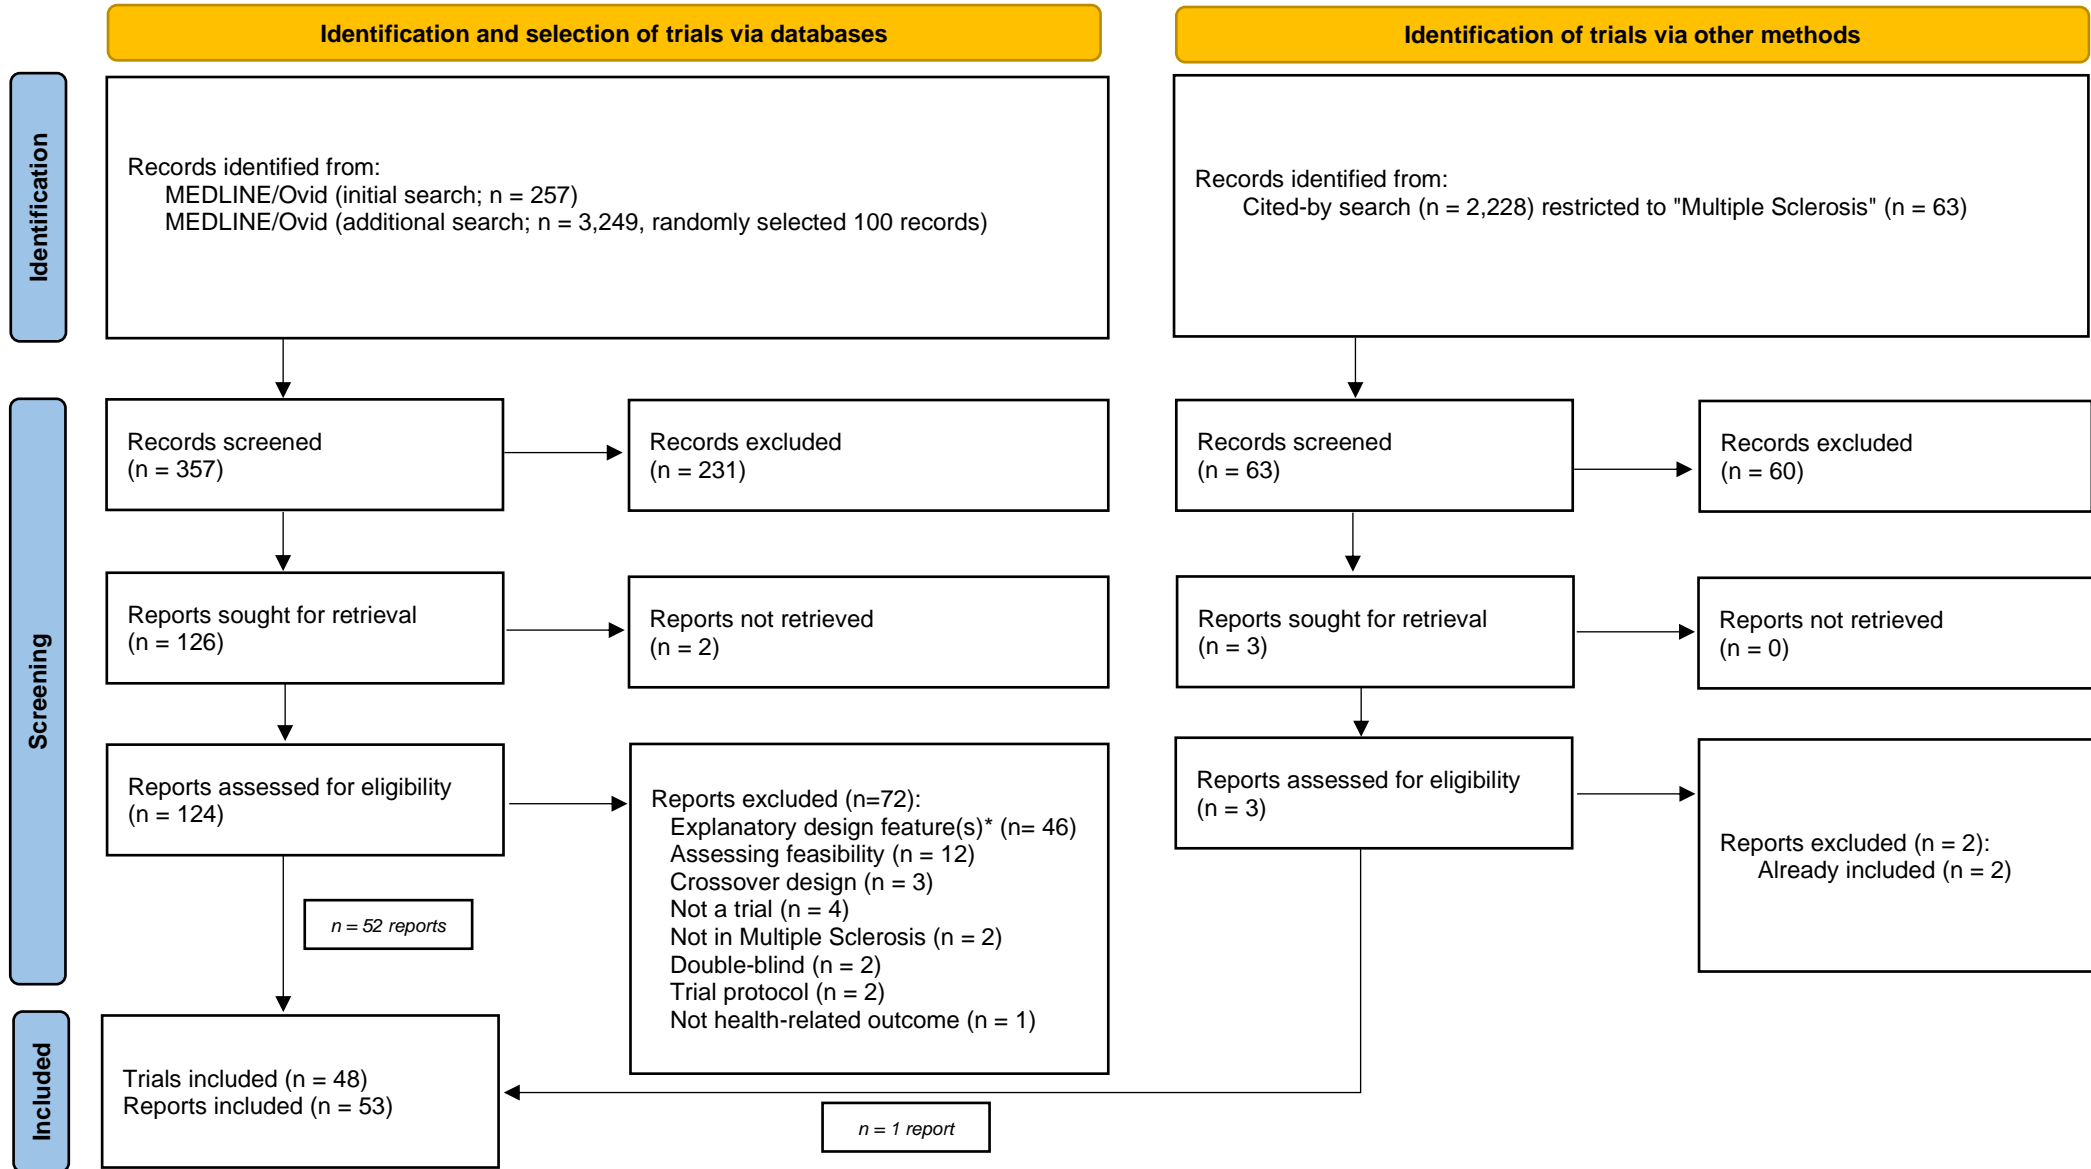

\* At least one PRECIS-2 domain was assessed with 1 and/or 2 indicating more explanatory than pragmatic design features.

### Appendix 3. Additional trial characteristics (n=48)

|                                                    | n (%)   |
|----------------------------------------------------|---------|
| Publication year                                   |         |
| Until 2000                                         | 2 (4)   |
| 2001-2005                                          | 3 (6)   |
| 2006-2010                                          | 5 (10)  |
| 2011-2015                                          | 14 (29) |
| 2016-2020                                          | 19 (40) |
| 2021 and later                                     | 5 (10)  |
| Journal                                            |         |
| Multiple Sclerosis Journal                         | 11 (23) |
| Clinical Rehabilitation                            | 8 (17)  |
| Health Technology Assessment                       | 3 (6)   |
| Journal of Neurology, Neurosurgery, and Psychiatry | 3 (6)   |
| Multiple Sclerosis and Related Disorders           | 2 (4)   |
| Neurology                                          | 2 (4)   |
| Other (each one publication)                       | 19 (40) |
| Country of conduct *                               | 44 (92) |
| UK                                                 | 18 (38) |
| Italy                                              | 6 (13)  |
| Denmark                                            | 5 (10)  |
| US                                                 | 5 (10)  |
| Australia                                          | 4 (8)   |
| Belgium                                            | 4 (8)   |
| Canada                                             | 4 (8)   |
| France                                             | 4 (8)   |
| Spain                                              | 4 (8)   |
| Other                                              | 9 (19)  |
| Number of randomized patients                      |         |
| < 100                                              | 28 (58) |
| 101-200                                            | 12 (25) |
| 201-300                                            | 1 (2)   |
| 301-400                                            | 2 (4)   |
| 401-500                                            | 2 (4)   |
| > 500                                              | 3 (6)   |
| Unit of randomization                              |         |
| Participant                                        | 47 (98) |
| Cluster                                            | 1 (2)   |
| Number of trial arms                               |         |
| 2                                                  | 45 (94) |
| 3                                                  | 2 (4)   |
| 4                                                  | 1 (2)   |
| Blinding (of outcome assessors)                    |         |
| Yes                                                | 10 (21) |
| Partly                                             | 3 (6)   |
| No                                                 | 28 (58) |
| Unclear                                            | 7 (15)  |

Abbreviations: n = Number; UK = United Kingdom; US = United States.

#### Appendix 4. PRECIS-2 assessment of individual trials (n=48)

|                                            | Self-labelled as "pragmatic" | Eligibility criteria | Eligibility criteria (cluster-randomized trials) | Recruitment | Recruitment (cluster-randomized trials) | Setting | Organization | Flexibility – intervention delivery | Flexibility – intervention adherence | Follow-up | Primary outcome | Primary analysis |
|--------------------------------------------|------------------------------|----------------------|--------------------------------------------------|-------------|-----------------------------------------|---------|--------------|-------------------------------------|--------------------------------------|-----------|-----------------|------------------|
| Arntzen et al. [22,80]                     | No                           | 3                    | -                                                | 4           | -                                       | 5       | 4            | 5                                   | 4                                    | 4         | 5               | 5                |
| Boesen et al. <sup>23</sup> *              | Yes                          | 4                    | -                                                | 5           | -                                       | 4       | 5            | 5                                   | NI                                   | 4         | 5               | 5                |
| Bogosian et al. <sup>24</sup>              | No                           | 5                    | -                                                | 4           | -                                       | 5       | 4            | 3                                   | NI                                   | 3         | 5               | 5                |
| Calkwood et al. <sup>64</sup>              | No                           | 3                    | -                                                | 5           | -                                       | 5       | 5            | NI                                  | NI                                   | 4         | 5               | 5                |
| Callesen et al. <sup>25</sup>              | No                           | 4                    | NI                                               | 4           | NI                                      | 5       | 5            | 5                                   | 5                                    | 4         | 5               | 3                |
| Carter et al. <sup>27</sup>                | No                           | 3                    | -                                                | 4           | -                                       | 4       | 5            | 5                                   | 3                                    | 4         | 5               | 4                |
| Cooper et al. <sup>26</sup>                | No                           | 4                    | -                                                | 4           | -                                       | 5       | 5            | 5                                   | 4                                    | 4         | 5               | 4                |
| Cutter et al. <sup>28</sup>                | No                           | 4                    | -                                                | NI          | -                                       | 5       | NI           | NI                                  | 4                                    | 3         | 5               | 5                |
| Dodd et al. <sup>29</sup>                  | No                           | 4                    | -                                                | 3           | -                                       | 5       | 5            | NI                                  | 4                                    | 4         | 5               | 4                |
| Feys et al. <sup>30</sup> *                | Yes                          | 3                    | -                                                | 4           | -                                       | 5       | 2            | 5                                   | 2                                    | 1         | 3               | 3                |
| Finch et al. <sup>31</sup> *               | Yes                          | 5                    | -                                                | 5           | -                                       | 4       | 5            | 5                                   | NI                                   | NI        | 5               | NI               |
| Freeman et al. <sup>26</sup> *             | Yes                          | 5                    | -                                                | 5           | -                                       | 5       | 4            | 3                                   | 2                                    | 3         | 5               | 3                |
| Garrett et al. <sup>33</sup> *             | Yes                          | 5                    | -                                                | 5           | -                                       | 5       | NI           | 3                                   | 3                                    | 5         | 5               | 2                |
| Giovannoni et al. <sup>34</sup>            | No                           | 3                    | -                                                | NI          | -                                       | 5       | NI           | NI                                  | NI                                   | 4         | 5               | NI               |
| Grossman et al. <sup>35</sup>              | No                           | 5                    | -                                                | 4           | -                                       | 3       | 5            | NI                                  | 5                                    | 5         | 5               | 5                |
| Gunn et al. <sup>36,79</sup> *             | Yes                          | 4                    | -                                                | 4           | -                                       | 5       | 5            | 5                                   | 4                                    | 4         | 5               | 4                |
| Hermens et al. <sup>37,81</sup>            | No                           | 4                    | -                                                | NI          | -                                       | 4       | 5            | NI                                  | NI                                   | 4         | 5               | NI               |
| Higginson et al. <sup>38</sup>             | No                           | 4                    | -                                                | 5           | -                                       | 4       | 4            | 5                                   | NI                                   | 4         | 5               | 4                |
| Hoogstraten et al. <sup>65</sup>           | No                           | 5                    | -                                                | NI          | -                                       | 5       | 5            | NI                                  | NI                                   | 4         | NI              | NI               |
| Humphreys et al. <sup>39</sup>             | No                           | 3                    | -                                                | 3           | -                                       | 4       | 4            | 4                                   | NI                                   | 4         | 5               | 5                |
| Jongen et al. <sup>40</sup>                | No                           | 4                    | -                                                | 5           | -                                       | 5       | 4            | 5                                   | NI                                   | 4         | 5               | 3                |
| Khayeri et al. <sup>41</sup>               | No                           | 5                    | -                                                | 5           | -                                       | 4       | NI           | 4                                   | NI                                   | 5         | NI              | NI               |
| Kiropoulos et al. <sup>42</sup>            | No                           | 4                    | -                                                | 3           | -                                       | 4       | 4            | 5                                   | 5                                    | 3         | 5               | 5                |
| Langeskov-Christensen et al. <sup>66</sup> | No                           | 5                    | -                                                | NI          | -                                       | 4       | 5            | 4                                   | 3                                    | 3         | NI              | 5                |
| Learmonth et al. <sup>43</sup>             | No                           | 4                    | -                                                | 5           | -                                       | 5       | 5            | 3                                   | 3                                    | 4         | 5               | 3                |
| Lincoln et al. <sup>44,77</sup> *          | Yes                          | 5                    | -                                                | 4           | -                                       | 4       | 2            | 3                                   | 4                                    | 3         | 5               | 4                |
| Mayo et al. <sup>45</sup> *                | Yes                          | 4                    | -                                                | 4           | -                                       | 5       | 5            | 5                                   | 2                                    | 3         | 1               | 2                |
| Mazdeh et al. <sup>67</sup>                | No                           | 3                    | -                                                | 5           | -                                       | 4       | 5            | NI                                  | NI                                   | 5         | NI              | NI               |
| McClurg et al. <sup>46</sup> *             | Yes                          | 5                    | -                                                | 4           | -                                       | 5       | 3            | 5                                   | 3                                    | 2         | 5               | 4                |
| Medina-Perez et al. <sup>68</sup>          | No                           | 4                    | -                                                | 5           | -                                       | 4       | 4            | 3                                   | 3                                    | 3         | NI              | 5                |
| Millar et al. <sup>69</sup>                | No                           | 5                    | -                                                | NI          | -                                       | 5       | 5            | 5                                   | NI                                   | 4         | NI              | NI               |
| Miller et al. <sup>47</sup>                | No                           | 4                    | -                                                | 4           | -                                       | 4       | 5            | 5                                   | NI                                   | 4         | 5               | NI               |
| O'Hara et al. <sup>48</sup>                | No                           | 5                    | -                                                | NI          | -                                       | 4       | 3            | 5                                   | NI                                   | 5         | 5               | 5                |
| Papeix et al. <sup>49</sup>                | No                           | 4                    | -                                                | 5           | -                                       | 4       | 5            | 5                                   | NI                                   | 4         | 5               | 5                |
| Paul et al. <sup>50</sup> *                | Yes                          | 2                    | -                                                | 5           | -                                       | 4       | 5            | 4                                   | 4                                    | 3         | 5               | 3                |
| Pozzilli et al. <sup>51</sup>              | No                           | 5                    | -                                                | NI          | -                                       | 5       | 3            | 5                                   | NI                                   | 4         | 5               | 5                |
| Renfrew et al. <sup>52</sup>               | No                           | 3                    | -                                                | 5           | -                                       | 5       | 5            | 4                                   | NI                                   | 4         | 5               | NI               |
| Riemenschneider et al. <sup>62</sup>       | No                           | 4                    | -                                                | 4           | -                                       | 4       | 4            | 5                                   | 3                                    | 3         | 3               | 5                |
| Solari et al. <sup>53</sup>                | No                           | 4                    | -                                                | NI          | -                                       | 5       | 5            | 5                                   | NI                                   | 3         | 5               | 5                |
| Straudi et al. <sup>63</sup>               | No                           | 5                    | -                                                | 5           | -                                       | 4       | 4            | 5                                   | 3                                    | 4         | 5               | 5                |
| Stuifbergen et al. <sup>54</sup> *         | Yes                          | 5                    | -                                                | 3           | -                                       | 5       | 3            | NI                                  | 3                                    | 3         | 5               | 5                |
| Thomas et al. <sup>55,80</sup> *           | Yes                          | 4                    | -                                                | 4           | -                                       | 4       | 4            | 3                                   | 5                                    | 4         | 5               | 5                |
| Torkhani et al. <sup>56</sup>              | No                           | 5                    | -                                                | 5           | -                                       | 5       | 5            | 5                                   | 4                                    | 5         | 5               | 5                |
| Velikonja et al. <sup>57</sup>             | No                           | 5                    | -                                                | NI          | -                                       | 4       | 4            | NI                                  | 3                                    | 4         | 5               | NI               |
| Vermöhlen et al. <sup>58</sup>             | No                           | 3                    | -                                                | NI          | -                                       | 5       | 3            | 4                                   | NI                                   | 4         | 5               | 5                |
| Ward et al. <sup>59</sup>                  | No                           | 5                    | -                                                | 4           | -                                       | 4       | 4            | 5                                   | NI                                   | 4         | 5               | 5                |
| Weinstock-Guttman et al. <sup>60</sup>     | No                           | 5                    | -                                                | NI          | -                                       | 4       | 3            | 5                                   | NI                                   | 3         | 4               | NI               |
| Williams et al. <sup>61</sup>              | No                           | 4                    | -                                                | NI          | -                                       | 4       | 4            | 4                                   | 4                                    | 4         | 5               | 4                |

Abbreviations: - = Not applicable; NI = No sufficient information to assess the domain.

Notes: 1 = very explanatory; 2 = rather explanatory; 3 = equally pragmatic/explanatory; 4 = rather pragmatic; 5 = very pragmatic <sup>74</sup>; Notes: \* Trials self-labelled as "pragmatic". References are provided in the main text of the publication.
